# Supplementary material for: Novel visible light-induced g-C3N4 quantum dot/BiPO4 nanocrystal composite photocatalysts for efficient degradation of methyl orange
Source: Royal Society of Chemistry journal article supplement (doi:10.1039/c4ra05749j), 2014-01-01
Supplement: c4ra05749j1.pdf [file c4ra05749j1.pdf]

## Novel visible light-induced g-C<sub>3</sub>N<sub>4</sub> quantum dots/BiPO<sub>4</sub> nanocrystals composite photocatalysts for efficient degradation of methyl orange

Zesheng Li,<sup>\*a</sup> Bolin Li,<sup>a</sup> Shaohong Peng,<sup>a</sup> Dehao Li,<sup>a</sup> Shiyang Yang,<sup>b</sup> Yueping Fang<sup>\*b</sup>

<sup>a</sup> Development Center of Technology for Petrochemical Pollution Control and Cleaner Production of Guangdong Universities,

College of Chemical Engineering, Guangdong university of Petrochemical Technology, Maoming, Guangdong, 525000, China;

<sup>b</sup> Institute of Biomaterial, College of Science, South China Agricultural University, Guangzhou, 510642, China.

Correspondence author: Zesheng Li E-mail: [lzs212@163.com](mailto:lzs212@163.com); Yueping Fang E-mail: [ypfang@scau.edu.cn](mailto:ypfang@scau.edu.cn).

In a typical synthesis, 20 mL amino cyanide (CH<sub>2</sub>N<sub>2</sub>) solution (50 wt. % in H<sub>2</sub>O) was mixed with a certain quality of bismuth nitrate (Bi(NO<sub>3</sub>)<sub>3</sub>•5H<sub>2</sub>O) and sodium di-hydrogen phosphate (NaH<sub>2</sub>PO<sub>4</sub>) in the presence of 30 mL diluted nitric acid solution (1 mol L<sup>-1</sup>). The above mixture was put into an ultrasonic water bath for 60 min in a high-intensity ultrasonic source (100 W and 40 kHz). During the ultrasonic irradiation, the temperature of the reaction solution rose to around 60 °C. When the reaction was complete, the white precipitation was collected and calcined at 550 °C for 4 h under nitrogen atmosphere to obtain the finally g-C<sub>3</sub>N<sub>4</sub> QDs/BiPO<sub>4</sub> NCs composite sample. In addition, the single BiPO<sub>4</sub> NCs sample was also synthesized without the addition of CH<sub>2</sub>N<sub>2</sub> while other conditions remain unchanged. For performance comparison, single g-C<sub>3</sub>N<sub>4</sub> sample was further synthesized by directly calcining CH<sub>2</sub>N<sub>2</sub> at 550 °C for 4 h under nitrogen atmosphere.

The XRD patterns were collected in a Bruker D8 Advance X-ray diffractometer (Cu Kα1 irradiation). Transmission electron microscopy (TEM) was recorded on a JEM-2010HR microscope. X-ray photoelectron spectroscopy (XPS) was conducted with two separate systems equipped with monochromatic Al K sources (ESCALab250). The photocatalytic activity was measured in a XPA-II reactor (Nanjing Xujiang Machineelectronic

Plant). To carry out the photochemical reaction the 0.1 g sample was suspended in a methyl orange (MO) dye aqueous solution (100 mL, 30 mg L<sup>-1</sup>) with stirring in the dark for 1 h to reach an equilibrium adsorption state. Then irradiated with a 300 W Xe arc lamp equipped with an ultraviolet cut off filter to provide visible light ( $\lambda > 420$  nm) source. Every a given reaction time (30 min), the solution (5 mL) was sampled and centrifuged, and the MO concentration was determined by an UV-visible spectrophotometer (UV-2550).

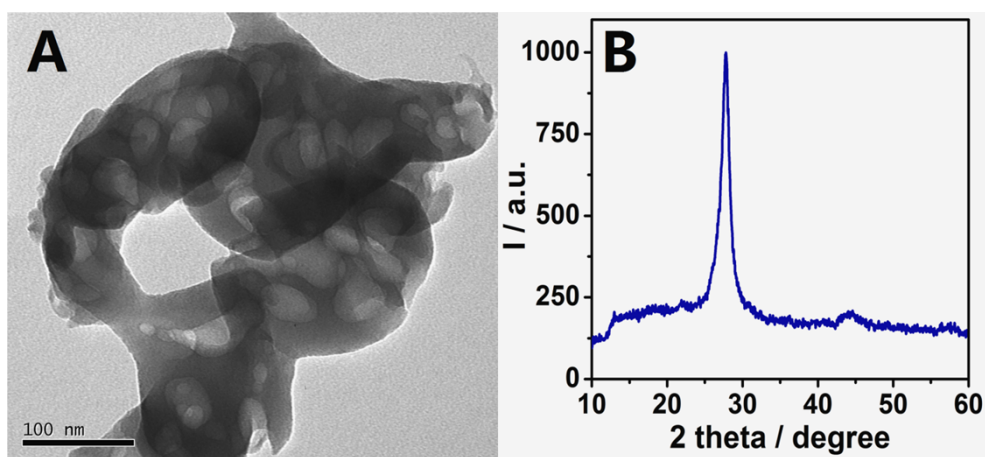

**Fig. S1** TEM image (A) and XRD pattern (B) of the single g-C<sub>3</sub>N<sub>4</sub> sample.
